# Supplementary material
Source: HighWire-hosted journal article supplement (https://www.cmaj.ca/highwire/filestream/59446/field_highwire_adjunct_files/0/150154-case-1-at.pdf)
Supplement: 150154-case-1-at.pdf [file 150154-case-1-at.pdf]

**APPENDIX 1 (as supplied by the authors): Results of laboratory tests and medication history**

**Results of Laboratory Tests Performed Before Referral**

| <b>Test</b>                                        | <b>Result</b>          | <b>Reference range</b> |
|----------------------------------------------------|------------------------|------------------------|
| Complete blood count and differential              | within reference range |                        |
| Creatinine                                         | 117 umol/L             | 60-127 umol/L          |
| C-reactive protein                                 | <3 mg/L                | 0-3 mg/L               |
| Total bilirubin                                    | 16 umol/L              | 0-23 umol/L            |
| Alkaline phosphatase                               | 108 u/L                | 30-110 u/L             |
| Alanine transaminase                               | 33 u/L                 | 4-43 u/L               |
| Immunoelectrophoresis-SER-IgG, IgA, IgM            | within reference range |                        |
| IgE (total)                                        | 384 kIU/L              | 0-432 kIU/L            |
| Anti-thyroglobulin and anti-microsomal antibodies. | Negative               | Negative               |
| Thyroid-stimulating hormone                        | 0.76 mu/L              | 0.30-4.70 mu/L         |

## Medication History

| <b>Medication (dose/day)</b>                   | <b>Dates of Use</b>              |
|------------------------------------------------|----------------------------------|
| Diphenhydramine (25mg-200mg)                   | Nov 2004 Intermittent            |
| Hydroxyzine (25mg-200mg)                       | Nov 2004                         |
| Montelukast (10mg)                             | Nov 2004                         |
| Desloratadine (5mg-20mg)                       | Nov 2004 – Aug 2005              |
| Doxepin (25mg-125mg)                           | Nov 2004 – Oct 2005              |
| Loratadine (10mg)                              | Nov 2004 – Nov 2005              |
| Cetirizine (10mg-40mg)                         | Nov 2004 – Present               |
| Hydroxychloroquine (400mg)                     | Dec 2004 – Feb 2005              |
| Prednisone (5mg-40mg)                          | Dec 2004 – Dec 2010 Intermittent |
| Ranitidine (300mg)                             | Jan 2005 – Dec 2005 Intermittent |
| Rosuvastatin (20mg)                            | Apr 2005 – Present               |
| IV gamma globulin (1g/kg for 3 days/<br>month) | Jul 2005 – Sep 2005              |
| Cyclosporine (300mg)                           | Dec 2005 – Feb 2006              |
| Clopidogrel (75mg)                             | Jan 2008 – Jun 2009              |
| Valsartan (80mg-160mg)                         | Jun 2010 – Present               |
